# Supplementary material for: A Newly Identified Monoterpenoid-Based Small Molecule Able to Support the Survival of Primary Cultured Dopamine Neurons and Alleviate MPTP-Induced Toxicity In Vivo
Source: MDPI journal article supplement (doi:10.3390/molecules27238286), 2022-11-28
Supplement: s1 [file s1]

## Supplementary material

A newly discovered small molecule able to support the survival of primary cultured dopamine neurons and alleviate MPTP-induced toxicity *in vivo*

Anastasiia Kotliarova<sup>1,2</sup>, Alexandra V. Podturkina<sup>1</sup>, Alla V. Pavlova<sup>1</sup>, Daria S. Gorina<sup>1,3</sup>, Anastasiya V. Lastovka<sup>1,3</sup>, Oleg V. Ardashov<sup>1</sup>, Artem D. Rogachev<sup>1,3</sup>, Arseniy E. Izyurov<sup>4</sup>, Alla B. Arefieva<sup>4</sup>, Alexander V. Kulikov<sup>4</sup>, Tatyana G. Tolstikova<sup>1</sup>, Konstantin P. Volcho<sup>1,\*</sup>, Nariman F. Salakhutdinov<sup>1</sup>, Yulia Sidorova<sup>2,\*</sup>

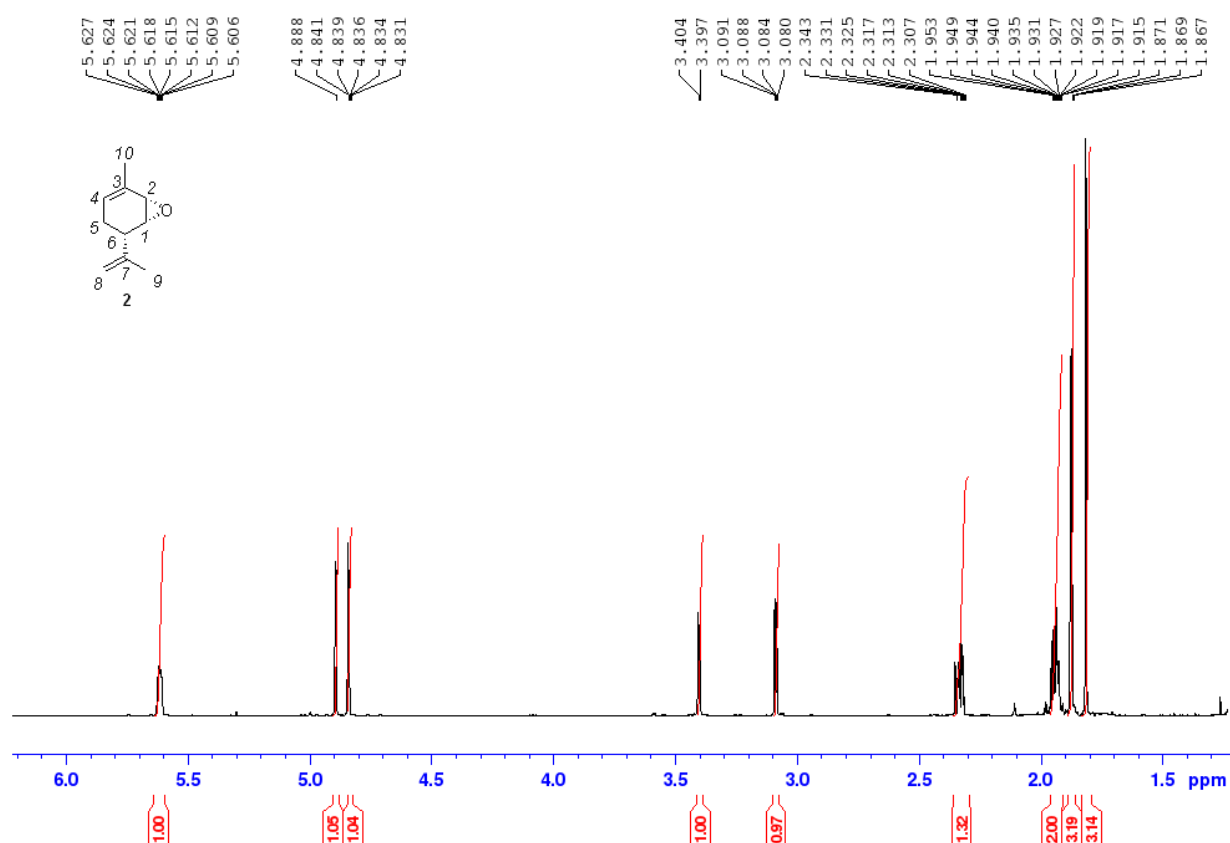

Figure S1: <sup>1</sup>H (600 MHz, CDCl<sub>3</sub>) spectrum of **2**

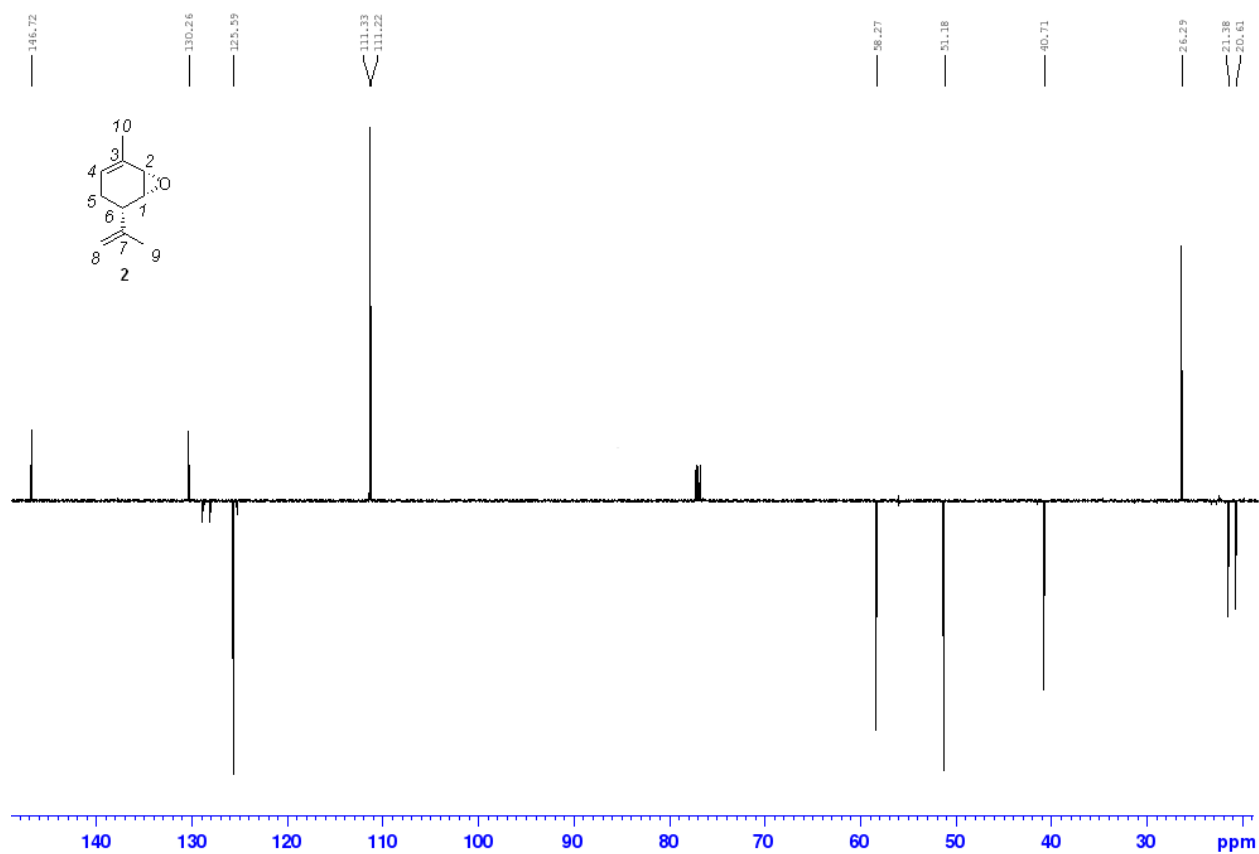

Figure S2:  $^{13}\text{C}$  (150 MHz,  $\text{CDCl}_3$ ) spectrum of **2**

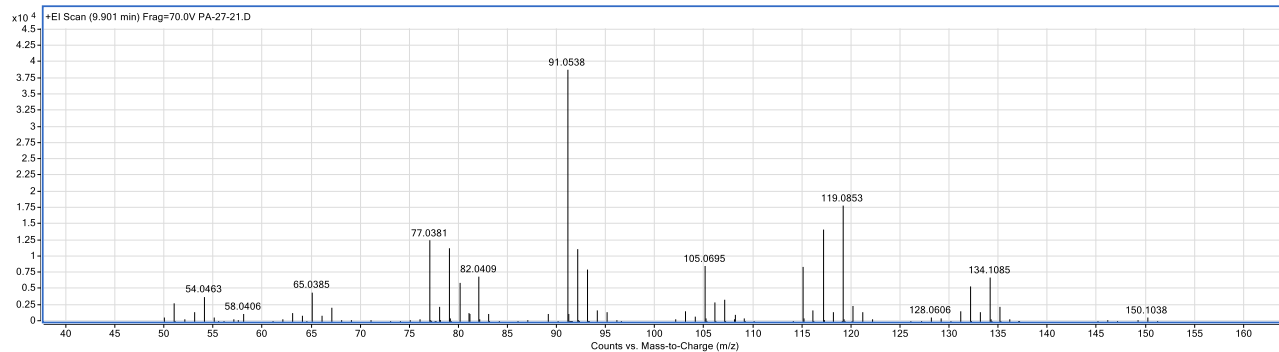

Figure S3: HR-MS spectrum of **2**

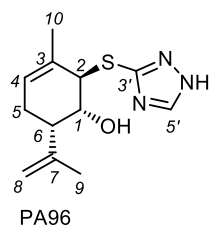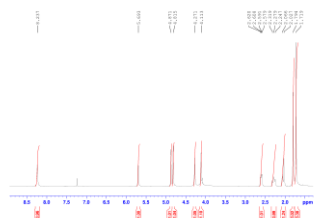

Figure S4:  $^1\text{H}$  (400 MHz,  $\text{CDCl}_3$ ) spectrum of PA96

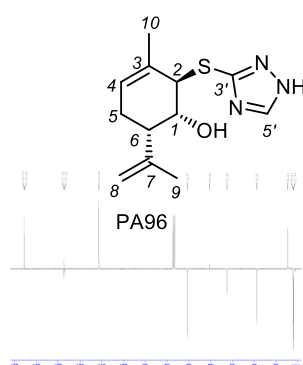

Figure S5:  $^{13}\text{C}$  (100 MHz,  $\text{CDCl}_3$ ) spectrum of PA96

PA-96a #8 RT: 0.48 AV: 1 NL: 9.35E5  
T: + c EI Full ms [ 14.50-280.50]

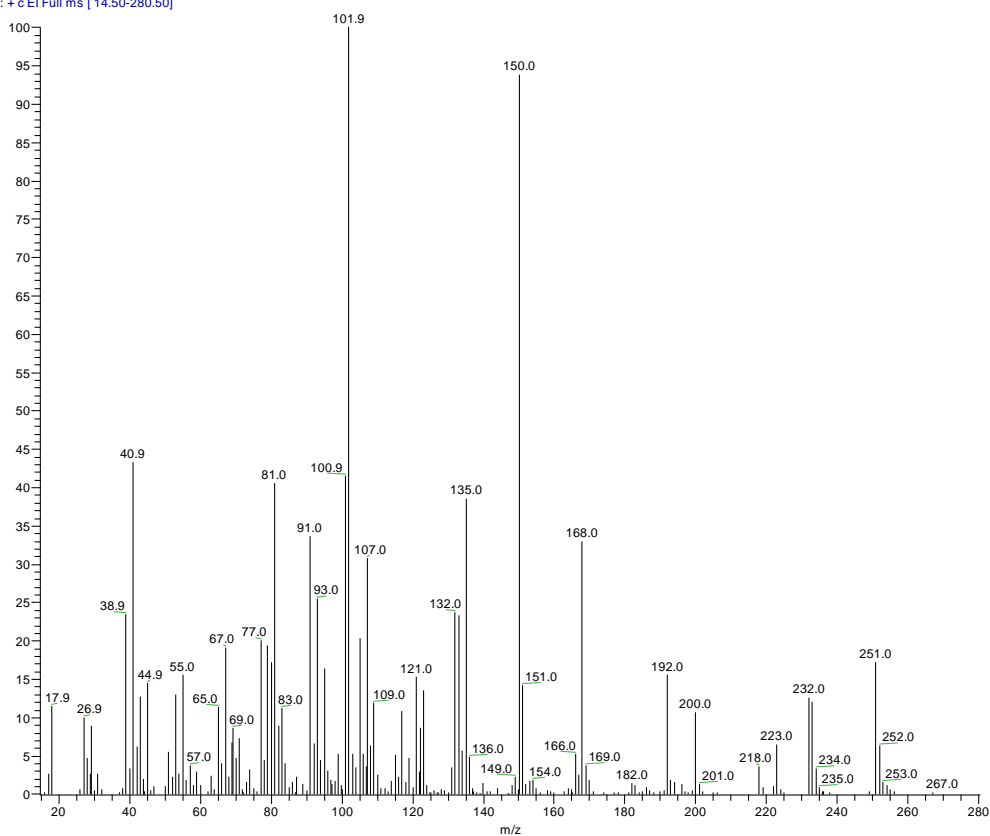

Figure S6: HR-MS spectrum of PA96

Table S1. Results of screening the effect of diol derivatives on naïve and MPP<sup>+</sup>-treated dopamine neurons

Support effect >100% – +++; 100-70% – ++; 69-30% – +; 29-1% – 0; 0% – -

Inhibition 69-30% – - -; 29-1% – - -

Compared to VEH-treated wells

| Substance | Structure                                                                           | Naïve  |      | MPP <sup>+</sup> |       |        |
|-----------|-------------------------------------------------------------------------------------|--------|------|------------------|-------|--------|
|           |                                                                                     | 0,1 uM | 1 uM | 1 nM             | 10 nM | 100 nM |
| 1         | 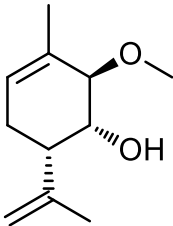   | +      | -    |                  |       |        |
| 2         |   | +      | +    |                  |       |        |
| 3         |  | +      | ++   | 0                | 0     | +      |
| 4         |  | -      | -    |                  |       |        |
| 5         |  | -      | -    |                  |       |        |

|       |                                                                                     |    |    |     |   |   |
|-------|-------------------------------------------------------------------------------------|----|----|-----|---|---|
| PA-96 | 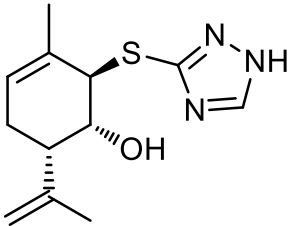   | ++ | +  | +++ | + | 0 |
| 7     |    | -  | -  |     |   |   |
| 8     |    | ++ | +  | 0   | 0 | 0 |
| 9     |   | -  | -  |     |   |   |
| 10    |  | -  | -  |     |   |   |
| 11    |  | 0  | -- |     |   |   |
| 12    |  | 0  | +  |     |   |   |
| 13    |  | 0  | -  |     |   |   |

|    |                                                                                     |   |   |  |  |  |
|----|-------------------------------------------------------------------------------------|---|---|--|--|--|
| 14 | 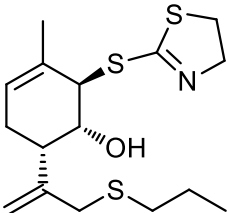   | 0 | + |  |  |  |
| 15 |    | 0 | - |  |  |  |
| 16 |    | 0 | + |  |  |  |
| 17 |   | 0 | - |  |  |  |
| 18 |  | - | + |  |  |  |
| 19 |  | + | + |  |  |  |
| 20 |  | + | + |  |  |  |
